# Supplementary material
Source: PubMed Central journal article supplement (PMC10876963)

**A**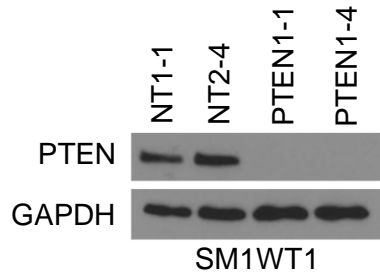**B**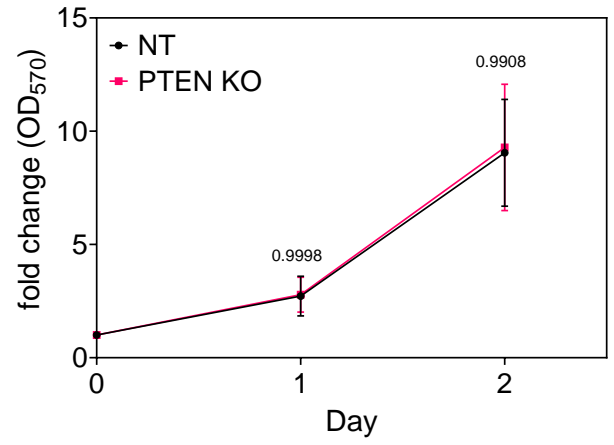**C**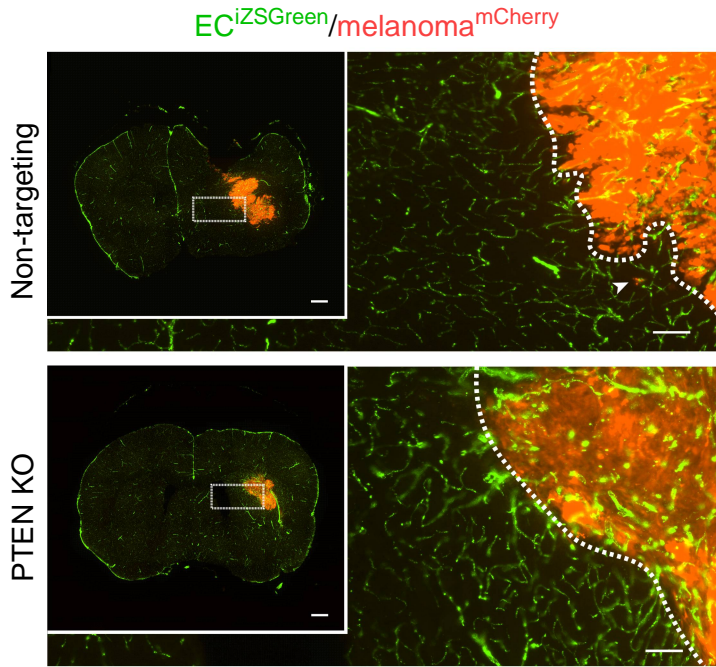**D**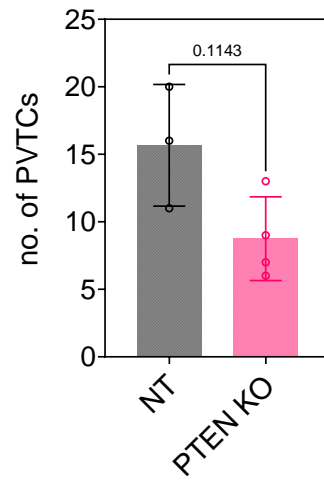**E**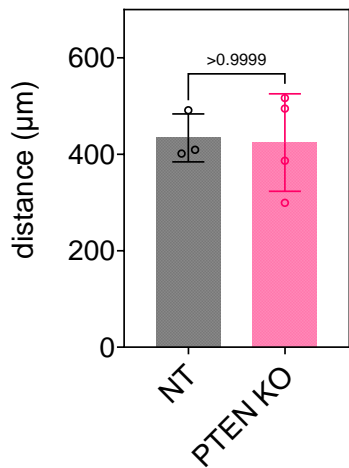**F**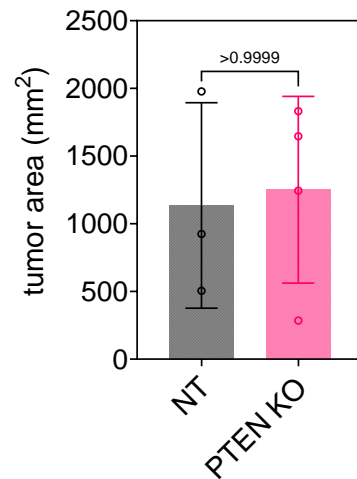

Supplement: 41416_2023_2530_MOESM1_ESM.pdf [file 41416_2023_2530_MOESM1_ESM.pdf]

A

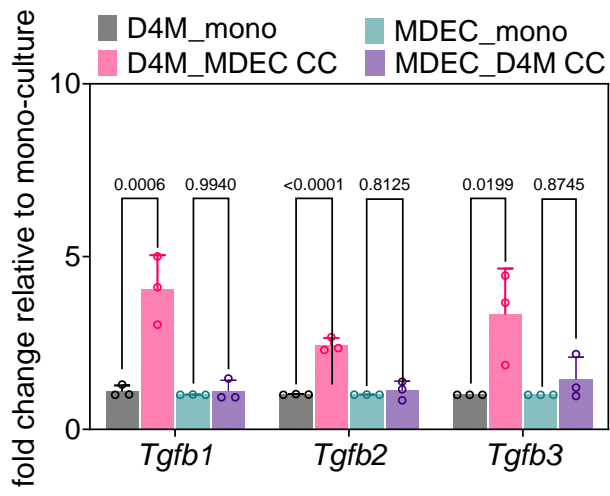

B

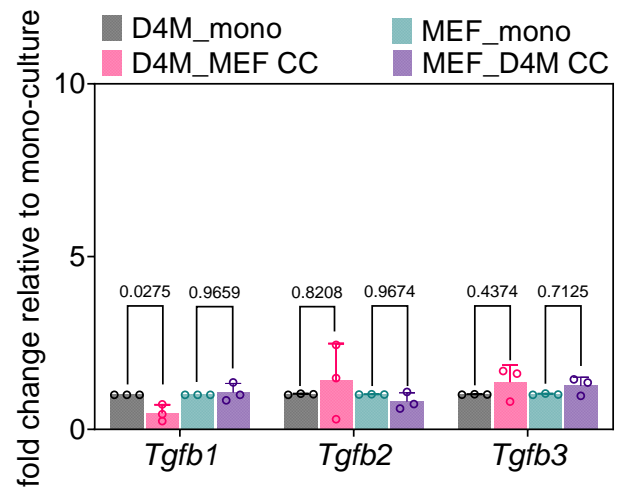

C

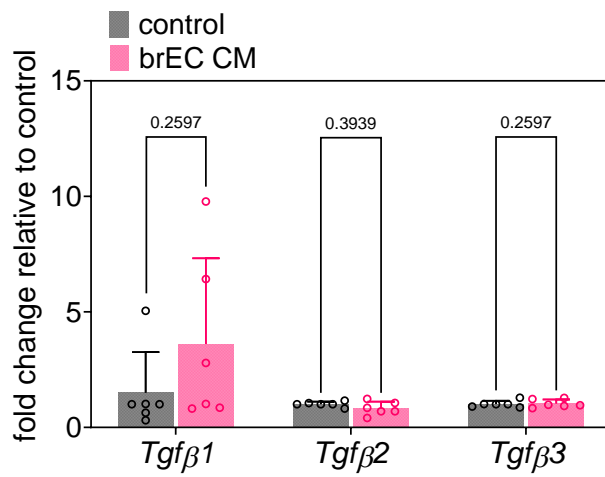

D

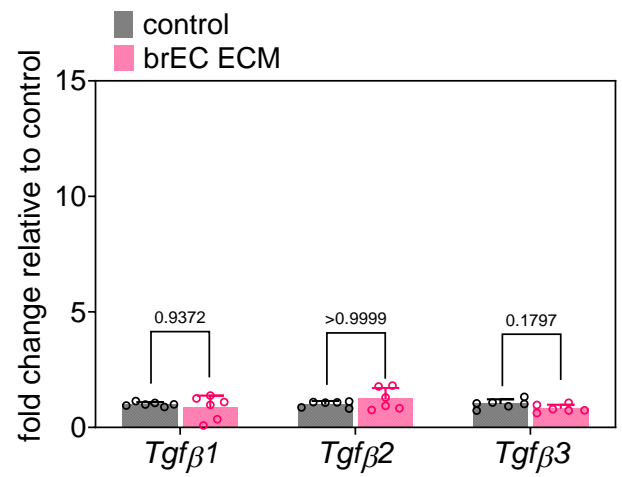

Supplement: 41416_2023_2530_MOESM2_ESM.pdf [file 41416_2023_2530_MOESM2_ESM.pdf]
